# Supplementary material
Source: PubMed Central journal article supplement (PMC3581884)
Supplement: 1215501110_pnas.201215501SI.pdf [file 1215501110_pnas.201215501SI.pdf]

# Supporting Information

Shi et al. 10.1073/pnas.1215501110

## SI Materials and Methods

**Plasmids.** The mammalian expression vector encoding Src homology region 2-containing protein tyrosine phosphatase-2 (SHP-2) has been described elsewhere (1). For purification of recombinant proteins from *Escherichia coli*, SHP-2 cDNA was inserted in-frame with the GST sequence in a pGEX bacterial expression vector. Introduction of the Cys-459 to Ser mutation was accomplished via oligonucleotide-mediated site-directed mutagenesis (QuikChange; Stratagene). All sequences were verified by direct DNA sequencing.

**Cell Culture.** HEK cells stably expressing neuronal nitric oxide (NO) synthase (nNOS; HEK-nNOS) were cultured as described previously (2, 3). To trigger NO production from nNOS, HEK-nNOS cells were exposed to the calcium ionophore A23187 (10  $\mu$ M); in some experiments, the NO synthase inhibitor *N*-nitro-*L*-arginine (1 mM) was included to block NO production. Mixed cortical neuronal/glial cultures were obtained from embryonic day 17 rats as previously described (4). Cells were grown on glass coverslips coated with poly-*L*-lysine and typically cultured 14 to 16 d in vitro. Cultures were transfected by using Lipofectamine 2000 (Invitrogen) and exposed to NMDA (Sigma) 2 d after transfection. NMDA exposure (50  $\mu$ M) for 20 min in Earle balanced salt solution (5) was followed by replacement of the buffer with the saved conditioned medium and incubation for an additional 1 h for biotin-switch assays or 16 h for cell death assays.

1. Chen Y, et al. (2003) Identification of Shp-2 as a Stat5A phosphatase. *J Biol Chem* 278(19):16520–16527.
2. Bredt DS, et al. (1991) Cloned and expressed nitric oxide synthase structurally resembles cytochrome P-450 reductase. *Nature* 351(6329):714–718.
3. Uehara T, et al. (2006) S-nitrosylated protein-disulphide isomerase links protein misfolding to neurodegeneration. *Nature* 441(7092):513–517.
4. Lei SZ, et al. (1992) Effect of nitric oxide production on the redox modulatory site of the NMDA receptor-channel complex. *Neuron* 8(6):1087–1099.

**Western Blot Analysis.** Proteins were resolved on 4% to 12% polyacrylamide gels and then transferred to nitrocellulose membranes. The membranes were blocked in 5% nonfat skim milk in Tris-buffered saline solution containing 0.1% Tween 20 and incubated with anti-SHP-2 antibody (C-18 or B-1; Santa Cruz Biotechnology), followed by incubation with secondary antibody. Proteins were visualized by using ECL Plus (GE Healthcare) as directed by the manufacturer.

**RNAi-Mediated Knockdown of SHP-2.** For expression of small hairpin SHP-2 RNAs, GATCCAAGAAGCAGAGAAGCTGCTTTCAAGAGAAGCAGCTTCTCTGCTTCTTTTA and AGCTTAAAGAGAAGCAGAGAAGCTGCTTCTCTTGAAGCAGCTTCTCTGCTTCTTG (SHP-2 shRNA1), or GATCCCACTGGG-GACTACTATGACTTCAAGAGAGTCATAGTAGTCCCCA-GTGTTA and AGCTTAACACTGGGGACTACTATGACTCTCTTGAAGTCATAGTAGTCCCCAGTGG (SHP-2 shRNA2) (6), were annealed and ligated into the HindIII and BamHI sites of pSilencer 4.1-CMV neo (Ambion). pSilencer-mediated knockdown of SHP-2 in culture was compared with cells transfected with pSilencer 4.1-CMV neo Negative Control, which was supplied with the pSilencer 4.1-CMV neo kit (Ambion). The pSilencer 4.1-CMV neo Negative Control plasmid encodes a hairpin RNA whose sequence was not found in the mouse, human, or rat genome databases.

5. Bonfoco E, Krainc D, Ankarcrona M, Nicotera P, Lipton SA (1995) Apoptosis and necrosis: Two distinct events induced, respectively, by mild and intense insults with N-methyl-D-aspartate or nitric oxide/superoxide in cortical cell cultures. *Proc Natl Acad Sci USA* 92(16):7162–7166.
6. Ivins Zito C, Kontaridis MI, Fornaro M, Feng GS, Bennett AM (2004) SHP-2 regulates the phosphatidylinositolide 3'-kinase/Akt pathway and suppresses caspase 3-mediated apoptosis. *J Cell Physiol* 199(2):227–236.

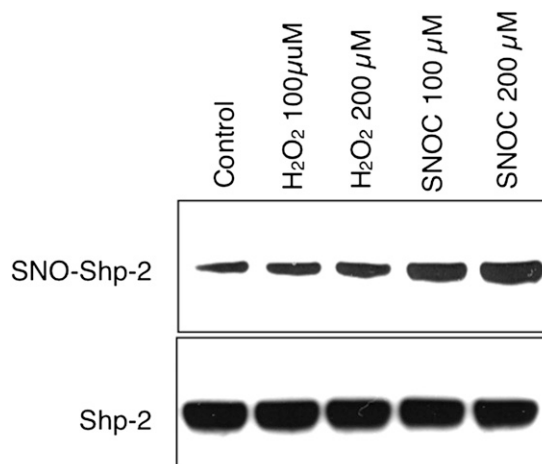

**Fig. S1.** S-nitrosocysteine (SNOC), but not H<sub>2</sub>O<sub>2</sub>, induces S-nitrosylation of SHP-2. The biotin-switch assay was used to detect SNO-SHP-2 formation in cerebrocortical neurons 15 min after exposure to SNOC or H<sub>2</sub>O<sub>2</sub>.
